# Supplementary material for: LOXL1 Is Regulated by Integrin α11 and Promotes Non-Small Cell Lung Cancer Tumorigenicity
Source: Cancers (Basel). 2019 May 22;11(5):705. doi: 10.3390/cancers11050705 (PMC6562909; doi:10.3390/cancers11050705)
Supplement: Supplementary file 1 [file cancers-11-00705-s001.pdf]

## Supplementary Material

# LOXL1 Is Regulated by Integrin $\alpha 11$ and Promotes Non-Small Cell Lung Cancer Tumorigenicity

Cédric Zeltz, Elena Pasko, Thomas R. Cox, Roya Navab and Ming-Sound Tsao

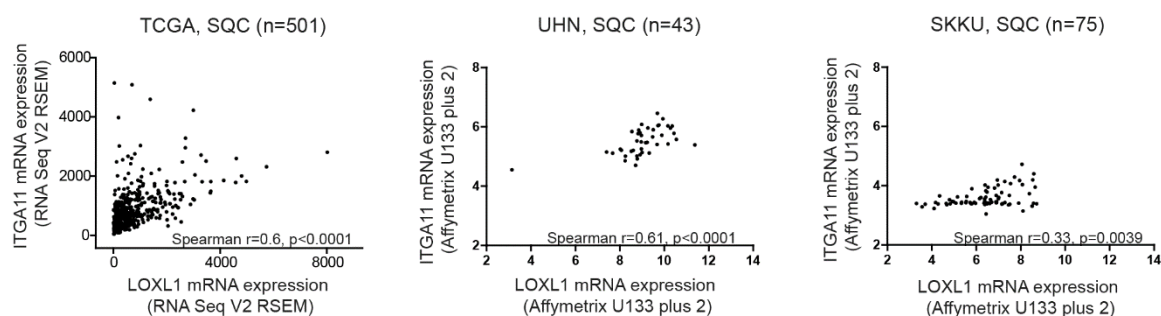

**Figure S1.** Spearman correlation between integrin  $\alpha 11$  and LOXL1 gene expression in NSCLC squamous cell carcinoma was analyzed from RNA-Seq data of the TCGA patient dataset ( $n = 501$ ) or microarray data of UHN ( $n = 43$ , GSE50081) and SKKU ( $n = 75$ , GSE8894) patient datasets.

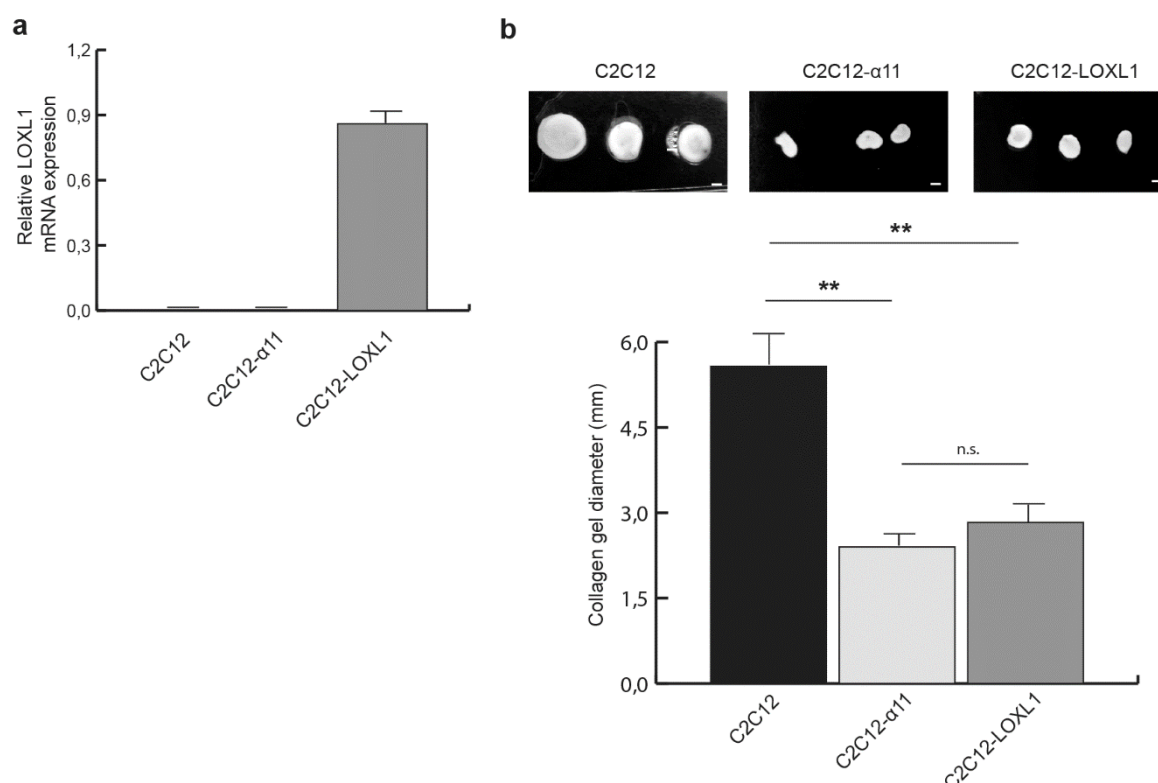

**Figure S2.** Effect of LOXL1 overexpression in C2C12-mediated collagen remodeling. (a) Analysis of human LOXL1 expression in C2C12s by RT-qPCR. (b) C2C12 cell lines were embedded in attached collagen gel and collagen gel diameter was measured 12 days later. Collagen gel contraction was assessed photographically. Scale bar: 1.5mm. Statistics were performed using Mann-Whitney (\*\*,  $p < 0.01$ , n.s., not significant).

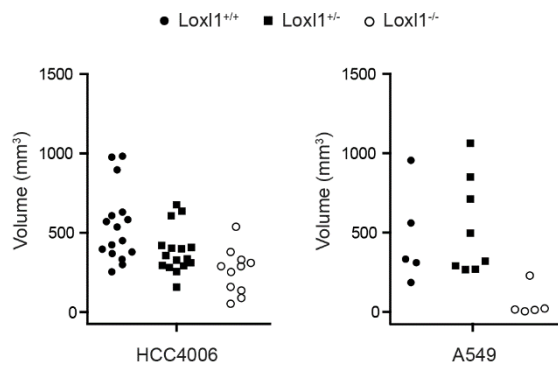

| HCC4006                                    |                              |
|--------------------------------------------|------------------------------|
|                                            | Mann-Whitney <i>p</i> -value |
| Lox1 <sup>+/+</sup> vs Lox1 <sup>+/-</sup> | 0.0479                       |
| Lox1 <sup>+/+</sup> vs Lox1 <sup>-/-</sup> | 0.0009                       |
| Lox1 <sup>+/-</sup> vs Lox1 <sup>-/-</sup> | 0.0248                       |

| A549                                       |                              |
|--------------------------------------------|------------------------------|
|                                            | Mann-Whitney <i>p</i> -value |
| Lox1 <sup>+/+</sup> vs Lox1 <sup>+/-</sup> | 0.9433                       |
| Lox1 <sup>+/+</sup> vs Lox1 <sup>-/-</sup> | 0.0159                       |
| Lox1 <sup>+/-</sup> vs Lox1 <sup>-/-</sup> | 0.0016                       |

**Figure S3.** Analysis of tumor volume at day 40 of HCC4006 ( $n = 11$ – $16$ ) and A549 ( $n = 5$ – $7$ ) xenografts in Lox1<sup>+/+</sup>, Lox1<sup>+/-</sup>, and Lox1<sup>-/-</sup> mice. The differences between these groups were tested using Mann-Whitney test.

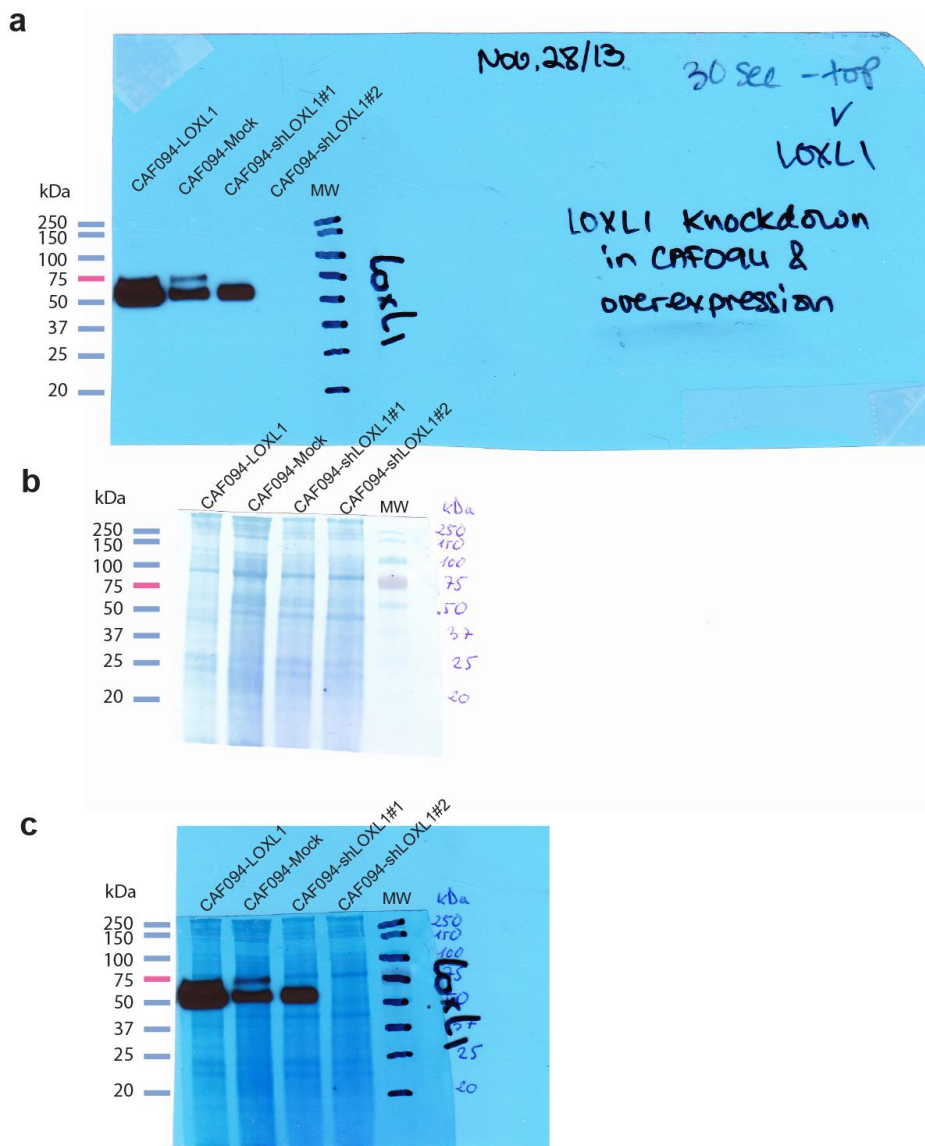

**Figure S4:** Full-size Western blots of Figure 2b. Protein extracts from indicated cells were transferred to a PVDF membrane, and the membrane was blotted with antibodies to LOXL1. Molecular weight marker (MW) was used and sizes of the bands were indicated. (a) Developed film. (b) Developed PVDF membrane stained with Coomassie blue. (c) Overlay of film and blot membrane. The expected size for LOXL1 is around 69 kDa.

**Table S1.** Spearman correlation between ITGA11 and LOX family member expression in three independent lung adenocarcinoma patient cohorts from UHN ( $n = 128$ ; GSE50081), SKKU ( $n = 63$ ; GSE8894), and The Cancer Genome Atlas (TCGA,  $n = 517$ ).

| Gene  | TCGA                  | UHN                   | SKKU                  |
|-------|-----------------------|-----------------------|-----------------------|
| LOXL1 | 0.68 ( $p < 0.0001$ ) | 0.78 ( $p < 0.0001$ ) | 0.61 ( $p < 0.0001$ ) |
| LOX   | 0.61 ( $p < 0.0001$ ) | 0.43 ( $p < 0.0001$ ) | 0.33 ( $p < 0.01$ )   |
| LOXL2 | 0.57 ( $p < 0.0001$ ) | 0.65 ( $p < 0.0001$ ) | 0.39 ( $p < 0.01$ )   |
| LOXL3 | 0.42 ( $p < 0.0001$ ) | 0.58 ( $p < 0.0001$ ) | 0.46 ( $p < 0.001$ )  |
| LOXL4 | 0.19 ( $p < 0.0001$ ) | 0.22 ( $p < 0.01$ )   | 0 ( $p = 0.88$ )      |

**Table S2.** Statistical analysis of collagen fiber alignment in CAF-populated collagen matrix (based on Figure 3A,B). Fisher's exact test was used for analysis of fibril orientation distribution.

| CAF094 Cell Line  | Fisher Exact Test $p$ -Value |
|-------------------|------------------------------|
| Mock vs. shLOXL1  | $1.77e^{-06}$                |
| Mock vs. LOXL1    | 0.0013                       |
| LOXL1 vs. shLOXL1 | $4.75e^{-15}$                |

**Table S3.** Statistical analysis of collagen fiber alignment in Loxl1 knockout and wild-type skin mice (based on Figure 3C,D). Fisher's exact test was used for analysis of fibril orientation distribution.

| Mouse                                        | Fisher Exact Test $p$ -Value |
|----------------------------------------------|------------------------------|
| Loxl1 <sup>+/+</sup> vs Loxl1 <sup>-/-</sup> | 0.0005                       |

**Table S4.** Statistical analysis of HCC4006 lung adenocarcinoma tumor growth in Loxl1<sup>+/+</sup>, Loxl1<sup>+/-</sup>, and Loxl1<sup>-/-</sup> mice (based on Figure 5A). The comparison between groups was performed within the mixed effect modeling. The mouse was considered a random effect, whereas the time and the genetic group and their interaction were the fixed effects. The volume of the tumor was the dependent variable. The residuals were inspected, and a square root transformation was applied to the volume to obtain residuals distributed normally and to eliminate the heteroscedasticity.

| Mouse                                         | Difference<br>(Square Root Scale) | 95% CI of the Difference<br>(Square Root Scale) | $p$ -Value |
|-----------------------------------------------|-----------------------------------|-------------------------------------------------|------------|
| Loxl1 <sup>+/+</sup> vs. Loxl1 <sup>-/-</sup> | 0.175                             | 0.129–0.221                                     | <0.0001    |
| Loxl1 <sup>+/-</sup> vs. Loxl1 <sup>-/-</sup> | 0.088                             | 0.042–0.133                                     | 0.0002     |
| Loxl1 <sup>+/+</sup> vs. Loxl1 <sup>+/-</sup> | 0.088                             | 0.046–0.129                                     | <0.0001    |

**Table S5.** Statistical analysis of A549 lung adenocarcinoma tumor growth in Loxl1<sup>+/+</sup>, Loxl1<sup>+/-</sup>, and Loxl1<sup>-/-</sup> mice (based on Figure 5B). The comparison between groups was performed within the mixed effect modeling. The mouse was considered a random effect, whereas the time and the genetic group and their interaction were the fixed effects. The volume of the tumor was the dependent variable. The residuals were inspected, and a log transformation was applied to the volume to obtain residuals distributed normally and to eliminate the heteroscedasticity. Models were fit starting when the tumor volume was above zero (Generally day 6).

| Mouse                                         | Difference (Log Scale) | 95% CI of the Difference (Log Scale) | p-Value |
|-----------------------------------------------|------------------------|--------------------------------------|---------|
| Loxl1 <sup>+/+</sup> vs. Loxl1 <sup>-/-</sup> | 0.0438                 | 0.0282–0.0594                        | <0.0001 |
| Loxl1 <sup>+/-</sup> vs. Loxl1 <sup>-/-</sup> | 0.0588                 | 0.0447–0.0729                        | <0.0001 |
| Loxl1 <sup>+/+</sup> vs. Loxl1 <sup>+/-</sup> | -0.0151                | -0.029–0.00116                       | 0.0339  |

**Table S6.** Statistical analysis of collagen fiber alignment in the A549/CAF xenograft model (based on Figure 5C,D). Fisher's exact test was used for analysis of fibril orientation distribution.

| Xenograft Tumor   | Fisher Exact Test p-Value |
|-------------------|---------------------------|
| A549 vs. Mock     | 0.033                     |
| A549 vs. shLOXL1  | 0.69                      |
| A549 vs. LOXL1    | 4.6e <sup>-5</sup>        |
| Mock vs. shLOXL1  | 0.011                     |
| Mock vs. LOXL1    | 0.049                     |
| LOXL1 vs. shLOXL1 | 8.14e <sup>-6</sup>       |

**Table S7.** List of NSCLC established cell lines used in Figure 1b and their associated histology.

| NSCLC Cell Line | Histology | NSCLC Cell Line | Histology | NSCLC Cell Line | Histology |
|-----------------|-----------|-----------------|-----------|-----------------|-----------|
| A549            | ADC       | H1395           | ADC       | H2126           | LC        |
| DFC1032         | ADC       | H1437           | ADC       | H2228           | ADC       |
| H23             | ADC       | H1573           | ADC       | H2279           | ADC       |
| H522            | ADC       | H1693           | ADC       | H2405           | ADC       |
| H647            | ADC       | H1792           | ADC       | H3255           | ADC       |
| H650            | ADC       | H1944           | ADC       | H4017           | LC        |
| H661            | LC        | H1975           | ADC       | HCC827          | ADC       |
| H838            | ADC       | H2009           | ADC       | HCC2935         | ADC       |
| H920            | ADC       | H2073           | ADC       | HCC4006         | ADC       |
| H1373           | ADC       | H2122           | ADC       | MGH7            | SQC       |

ADC, adenocarcinoma; LC, large cell; SQC, squamous cell carcinoma.

**Table S8.** Patient demographics, tumor stage, and pathological diagnosis for 20 tumor-isolated CAFs used in Figure 1b.

| PHLC * | Smoking History | Sex | Stage  | Histology |
|--------|-----------------|-----|--------|-----------|
| 094    | n.d.            | F   | III    | ADC       |
| 448    | Ex-Smoker       | M   | T2N0M0 | ADC       |
| 453    | Smoker          | M   | T1N0M0 | ADC       |
| 455    | Never           | F   | T1N0M0 | ADC       |
| 462    | Smoker          | F   | T2N0M0 | SQC       |
| 466    | Ex-Smoker       | M   | T2N0M0 | ADC       |
| 468    | Smoker          | F   | T2N0M0 | ADC       |
| 472    | Never           | F   | T1N0M0 | ADC       |
| 476    | Ex-Smoker       | F   | T3N0M0 | ADC       |
| 479    | Smoker          | F   | T1N0M0 | ADC       |
| 480    | Ex-Smoker       | M   | T2N0M0 | ADC       |
| 481    | Never           | F   | T2N0M0 | ADC       |

|     |           |   |        |     |
|-----|-----------|---|--------|-----|
| 482 | Ex-Smoker | M | T2N0M0 | SQC |
| 484 | Unknown   | F | T1N0M0 | ADC |
| 487 | Ex-Smoker | M | T4N0M0 | SQC |
| 488 | Never     | F | T1N0M0 | ADC |
| 489 | Smoker    | F | T2N0M0 | ADC |
| 491 | Ex-Smoker | F | T1N0M0 | ADC |
| 492 | Smoker    | M | T1N0M0 | ADC |
| 493 | Ex-Smoker | M | T2N0M0 | ADC |

n.d., not determined, M, male, F, female; \* PHLC (primary human lung cancer) numbers refer to 20 hematoxylin and eosin (H&E) slides from NSCLC primary tumors used in CAF cohort.

**Table S9.** RT-qPCR primer sequences.

| Gene   | Primer Sequence |                                  |
|--------|-----------------|----------------------------------|
| Mouse  |                 |                                  |
| Loxl1  | Forward         | 5'- TAGAGTAGTGGGTCTGGAGGC -3'    |
|        | Reverse         | 5'- GGGAGAGGAGCAAAGAAGTGG -3'    |
| Gapdh  | Forward         | 5'- GCAAGGACACTGAGCAAGAGA -3'    |
|        | Reverse         | 5'- ATTATGGGGGTCTGGGATGGA -3'    |
| Human  |                 |                                  |
| LOXL1  | Forward         | 5'- GTCGCTACGTTTCTGCAACA -3'     |
|        | Reverse         | 5'- GCTTTGGAAGGGGAGAGATT -3'     |
| ITGA11 | Forward         | 5'- TGCCCTTTTCTCTCACCCATC -3'    |
|        | Reverse         | 5'- CTTTCTTCATCCCTGGCTTGC -3'    |
| RPS13  | Forward         | 5'- GTTGCTGTTCGAAAGCATCTTG -3'   |
|        | Reverse         | 5'- AATATCGAGCCAAACGGTGAA -3'    |
| B2M    | Forward         | 5'- GAGTGCTGTCTCCATGTTTGATGT -3' |
|        | Reverse         | 5'- AAGTTGCCAGCCCTCCTAGAG -3'    |

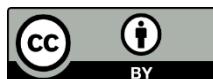

© 2019 by the authors. Licensee MDPI, Basel, Switzerland. This article is an open access article distributed under the terms and conditions of the Creative Commons Attribution (CC BY) license (<http://creativecommons.org/licenses/by/4.0/>).
